# Supplementary material
Source: Royal Society of Chemistry journal article supplement (doi:10.1039/d5ta10507b)
Supplement: d5ta10507b1.pdf [file d5ta10507b1.pdf]

## Supporting Information

### Dynamic Thiourea Networks Enable Self-Healing Chromic Films for Visual Detection of Light and Acidic Vapors

Heng-Hsuan Su,<sup>1</sup> Tse-Yu Lo,<sup>1</sup> Lin-Ruei Lee,<sup>1</sup> Mei-Li Li,<sup>1</sup> Chia-Wei Chang,<sup>1</sup> Huan-Wei Lin,<sup>1</sup> Kuan-Hung Liu,<sup>1</sup> Chih-Lin Chiang,<sup>1</sup> Po-Chia Huang,<sup>1</sup> and Jiun-Tai Chen\*,<sup>1, 2</sup>

<sup>1</sup>Department of Applied Chemistry, National Yang Ming Chiao Tung University, Hsinchu, Taiwan  
300093

<sup>2</sup>Center for Emergent Functional Matter Science, National Yang Ming Chiao Tung University, Hsinchu,  
Taiwan 300093

\*To whom correspondence should be addressed. E-mail: jtchen@nycu.edu.tw. Tel.: +886-3-5731631

**Table S1.** Comparison of reported self-healing chromic polymer systems

| Material                      | Healing condition | Healing time | Healing efficiency | Chromic response      | Key limitation                                             | Reference |
|-------------------------------|-------------------|--------------|--------------------|-----------------------|------------------------------------------------------------|-----------|
| PTU/TPU/SPCOOH                | 50 °C, RT         | 87%, 72%     | 12 h               | Yes (60-75 s)         | Trade-off between healing & chromism                       | This work |
| PU+PMA                        | 70 °C             | 97%          | 24 h               | Yes (15 min)          | Thermally activated disulfide exchange                     | (27)      |
| PDMS+Spiropyran               | 60 °C             | 73.5%        | 16 h               | Yes (10-20 s)         | Single functionality                                       | (28)      |
| Spiropyran-grafted AAO sensor | -                 | -            | -                  | Yes (seconds–minutes) | Irreversible after damage                                  | (22)      |
| PS/PAzo                       | RT                | N/A          | minutes–hours      | Yes (20-60min)        | Requires external trigger                                  | (18)      |
| Upcycled TPEE / Pazo fibers   | RT                | ~50%         | ~2 h               | Yes (~20 min)         | Incomplete mechanical recovery; light-dependent activation | (29)      |

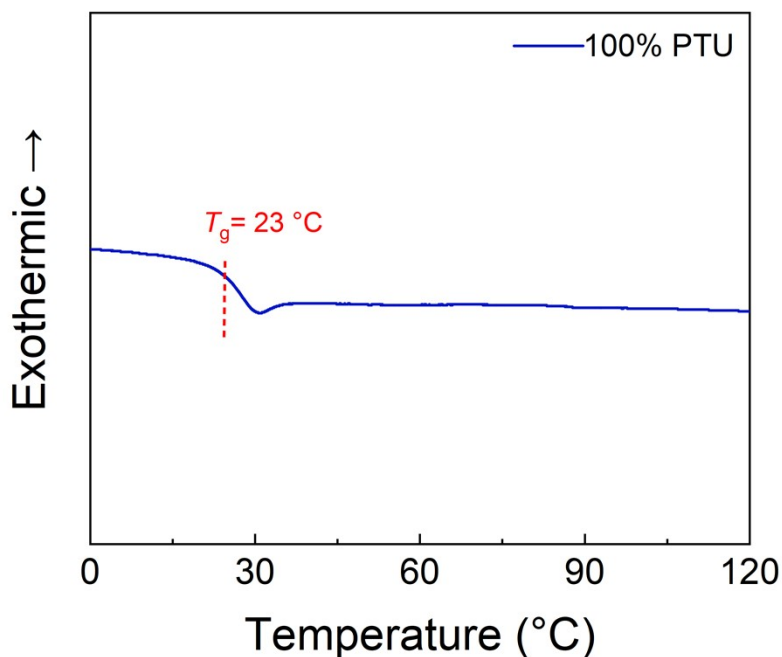**Figure S1.** DSC curve of pure PTU.

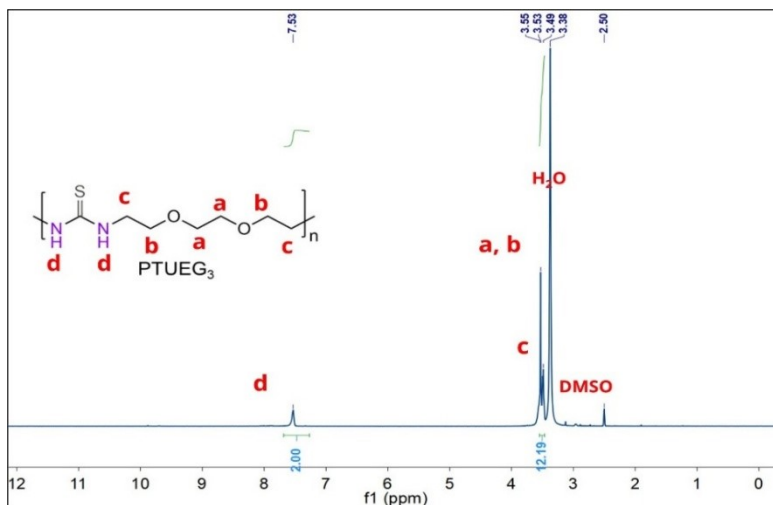

**Figure S2.** <sup>1</sup>H-NMR spectrum of pure PTU.

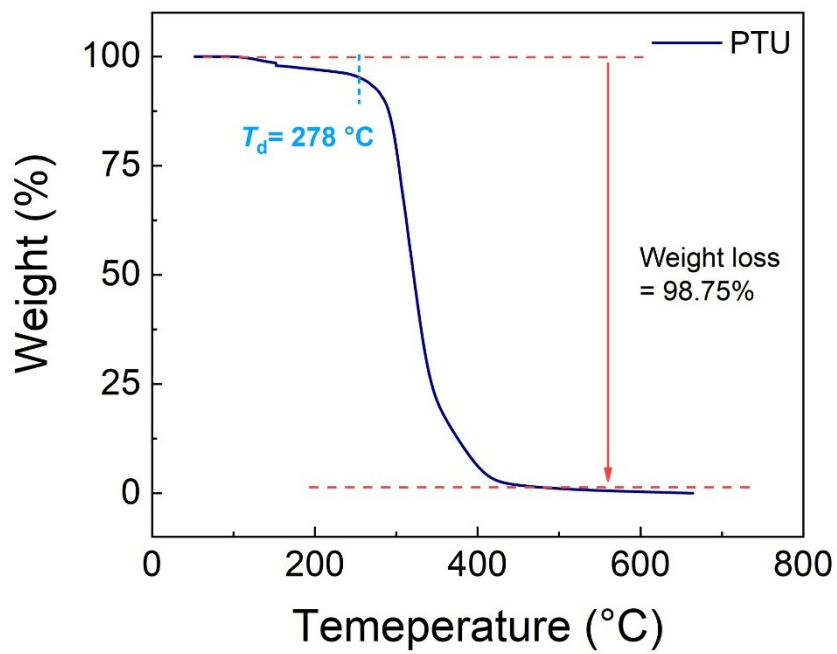

**Figure S3.** TGA curve of PTU.

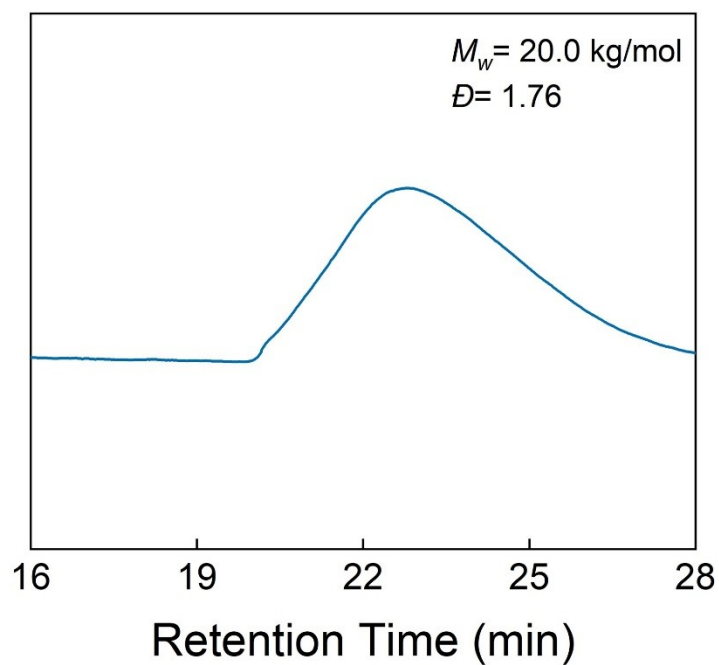

**Figure S4.** GPC analysis of PTU.

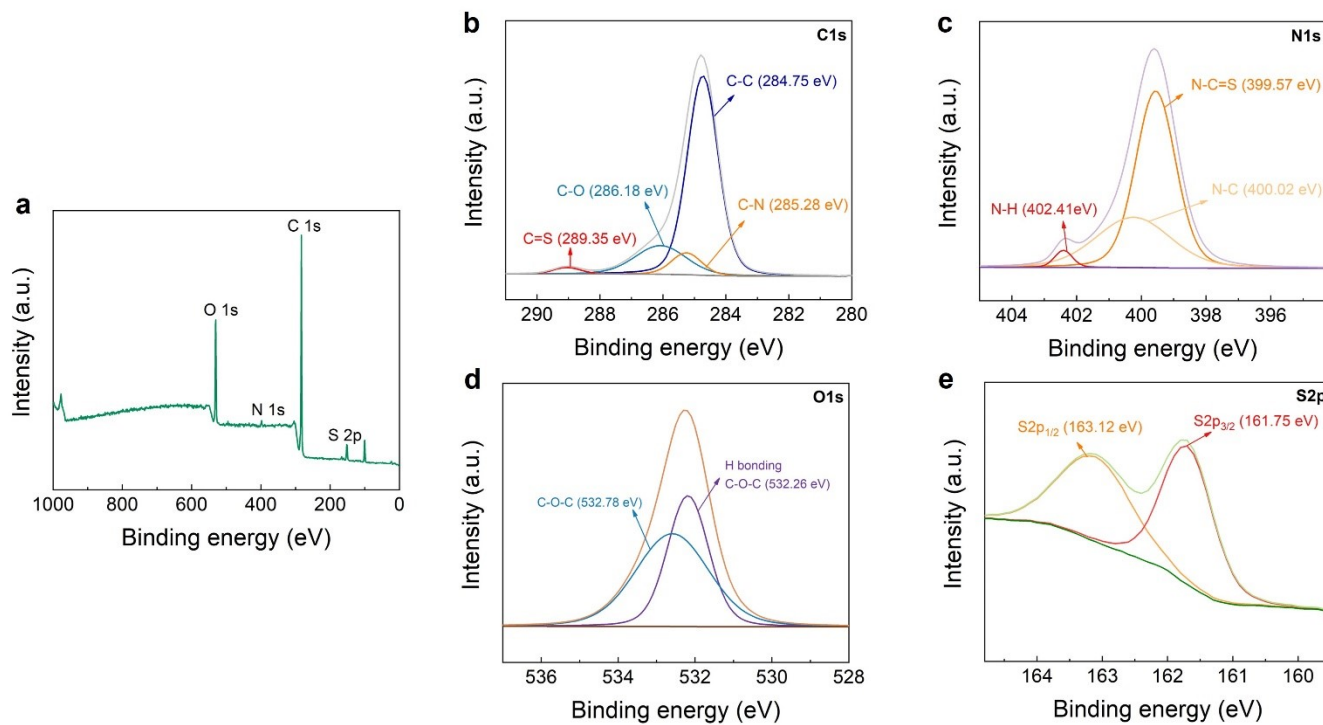

**Figure S5.** XPS spectra of the elemental compositions in the TPU/PTU film with a 50:50 weight ratio.

(a) Full survey spectrum. (b–e) C1s, N1s, O1s, and S2p spectra.

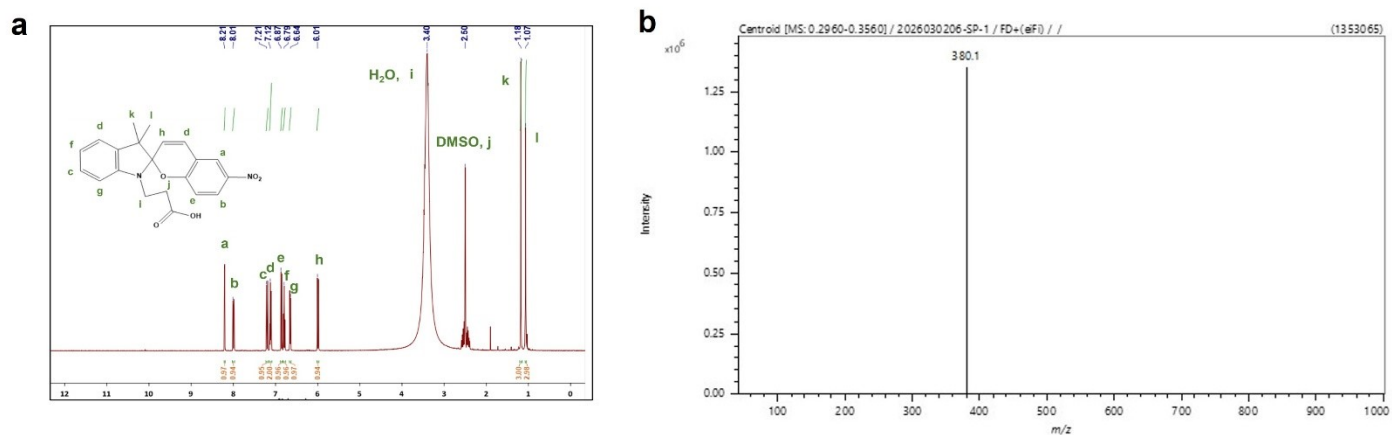

**Figure S6.** Characterization of spiropyran-COOH. (a.)  $^1\text{H-NMR}$  spectrum. (b.) LR-MS spectrum.

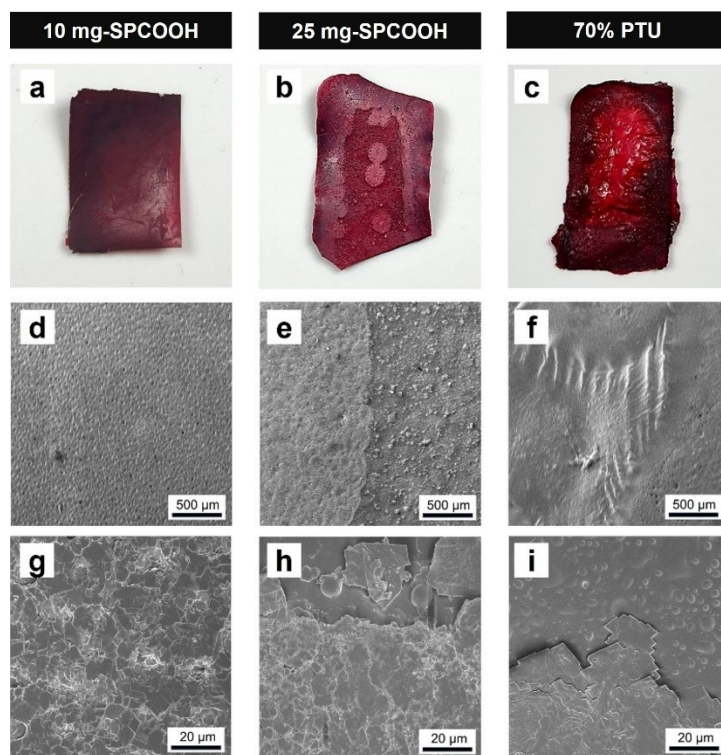

**Figure S7.** Composition-dependent morphological evolution of PTU/TPU/SPCOOH composite films. (a–c) Optical images of films containing (a) 10 mg-SPCOOH/50% PTU., (b) 25 mg-SPCOOH/50% PTU, and (c) 10 mg-SPCOOH/70% PTU, respectively. (d–f) Low-magnification SEM images corresponding to panels (a–c). (g–i) High-magnification SEM images corresponding to panels (a–c).

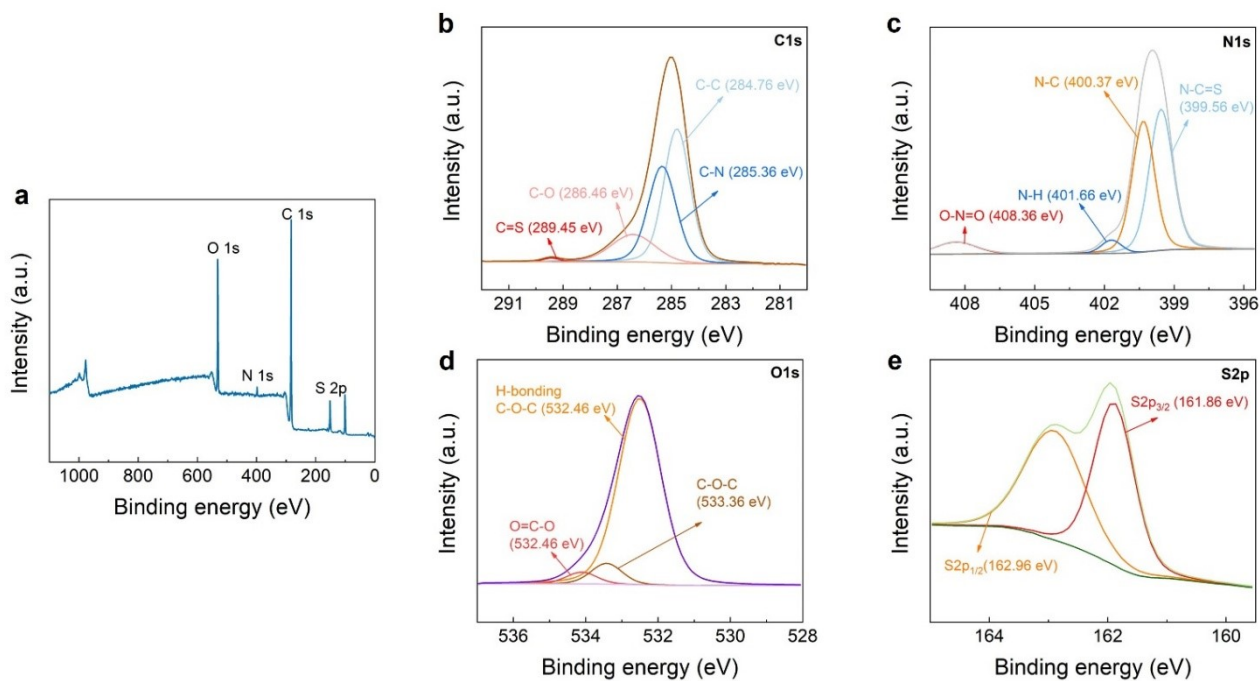

**Figure S8.** XPS spectra of the elemental compositions in the 10 mg-SPCOOH/PTU film. (a) Full survey spectrum. (b–e) C1s, N1s, O1s, and S2p spectra.

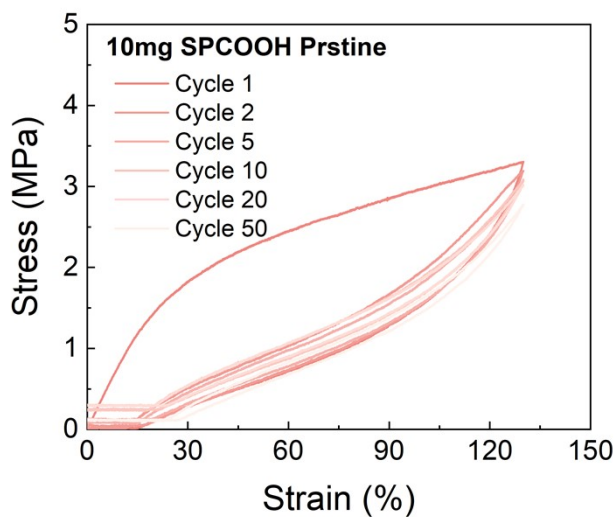

**Figure S9.** Cyclic tensile tests of the pristine 10mg-SPCOOH/PTU film.

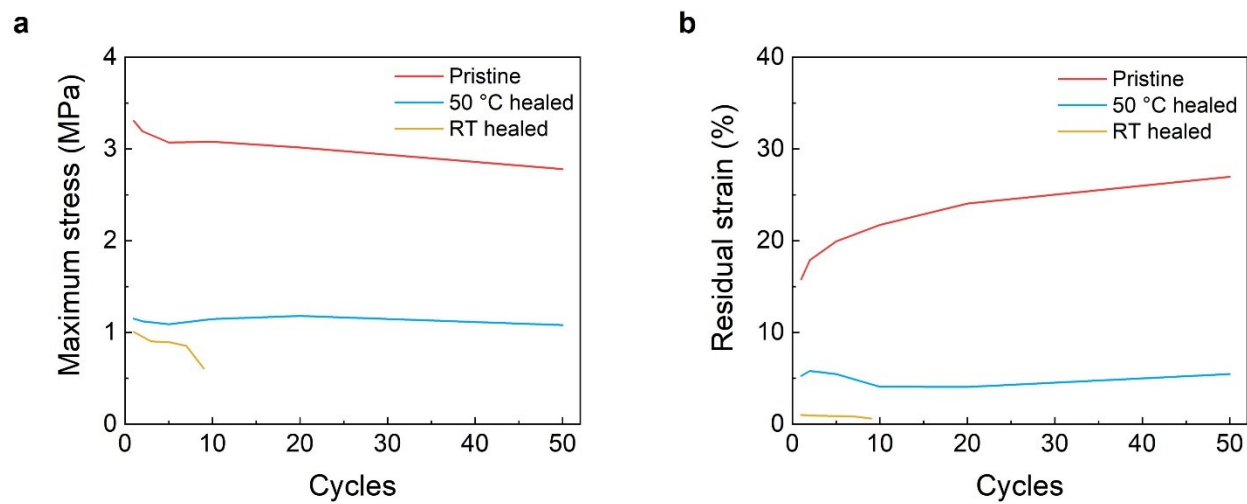

**Figure S10.** Evolution curves of the cyclic tensile tests for pristine, RT-healed, and 50 °C-healed specimens. (a) Maximum stress. (b) Residual strain.

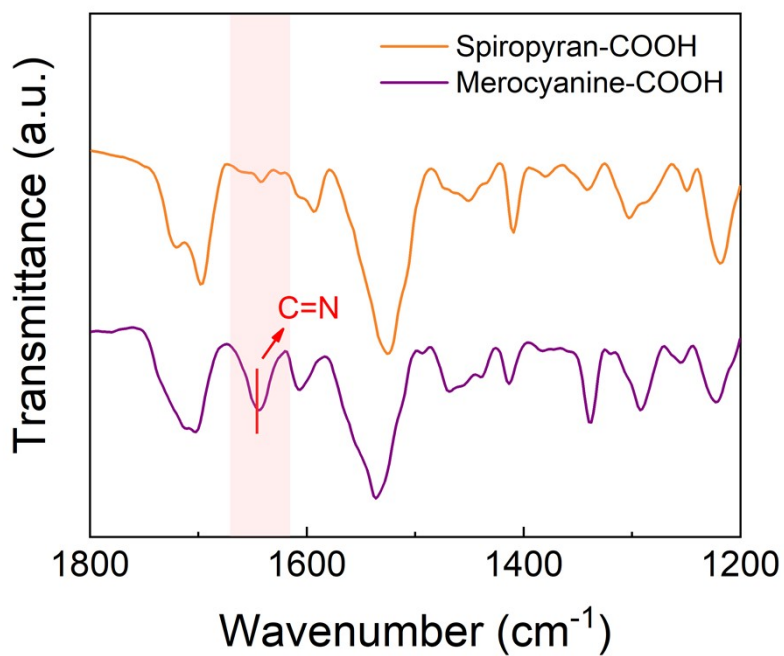

**Figure S11.** ATR-IR spectra of spiropyran-COOH and its merocyanine-COOH form.

**Table**

|         | <b>PTU ratio</b> | <b>SPCOOH (mg)</b> | <b>Healing time (h)</b> | <b>Elongation at break (%)</b> | <b>Tensile stress at break (MPa)</b> | <b>Healing efficiency (%)</b> |
|---------|------------------|--------------------|-------------------------|--------------------------------|--------------------------------------|-------------------------------|
| S2.5 mm | 50%              | 10                 | 0 (pristine)            | 204.17±0.80                    | 3.77±0.14                            | -                             |
| arized  | 50%              | 10                 | 8                       | 134.33±2.31                    | 2.01±0.08                            | 65.84±1.31                    |
| ed      | 50%              | 25                 | 0 (pristine)            | 204.11±0.81                    | 1.76±0.08                            | -                             |
|         | 50%              | 25                 | 8                       | 76.37±4.97                     | 0.73±0.07                            | 37.38±2.61                    |

table of mechanical properties for 10 and 25 mg-SPCOOH/PTU films

**Table S3.** Summarized table of mechanical properties for 50 and 70% PTU/SPCOOH films

| <b>PTU ratio</b> | <b>SPCOOH (mg)</b> | <b>Healing time (h)</b> | <b>Elongation at break (%)</b> | <b>Tensile stress at break (MPa)</b> | <b>Healing efficiency (%)</b> |
|------------------|--------------------|-------------------------|--------------------------------|--------------------------------------|-------------------------------|
| 50%              | 10                 | 0 (pristine)            | 204.17±0.80                    | 3.77±0.14                            | -                             |
| 50%              | 10                 | 24                      | 160.75±3.05                    | 2.33±0.20                            | 78.53±1.28                    |
| 70%              | 10                 | 0 (pristine)            | 68.47±2.84                     | 0.15±0.03                            | -                             |
| 70%              | 10                 | 24                      | 52.67±4.16                     | 0.10±0.01                            | 77.74±9.22                    |

**Table S4.** Summarized table of mechanical properties for 10 mg-SPCOOH/ PTU films at room temperature

| <b>PTU ratio</b> | <b>SPCOOH (mg)</b> | <b>Healing time (h)</b> | <b>Elongation at break (%)</b> | <b>Tensile stress at break (MPa)</b> | <b>Healing efficiency (%)</b> | <b>Young's modulus (MPa)</b> |
|------------------|--------------------|-------------------------|--------------------------------|--------------------------------------|-------------------------------|------------------------------|
| 50%              | 10                 | 0 (pristine)            | 204.17±0.80                    | 3.77±0.14                            | -                             | 9.59±0.11                    |
| 50%              | 10                 | 6                       | 44.11±1.54                     | 1.18±0.24                            | 21.53±0.80                    | 4.17±0.21                    |
| 50%              | 10                 | 8                       | 56.03±1.19                     | 1.67±0.12                            | 27.50±0.57                    | 6.31±0.92                    |
| 50%              | 10                 | 12                      | 145.67±5.13                    | 2.40±0.03                            | 71.43±0.51                    | 5.08±1.58                    |
| 50%              | 10                 | 24                      | 160.75±3.05                    | 2.33±0.20                            | 78.53±1.28                    | 5.92±0.72                    |

**Table S5.** Summarized table of mechanical properties for 10 mg-SPCOOH/ PTU films at 50 °C

| <b>PTU ratio</b> | <b>SPCOOH (mg)</b> | <b>Healing time (h)</b> | <b>Elongation at break (%)</b> | <b>Tensile stress at break (MPa)</b> | <b>Healing efficiency (%)</b> | <b>Young's modulus (MPa)</b> |
|------------------|--------------------|-------------------------|--------------------------------|--------------------------------------|-------------------------------|------------------------------|
| 50%              | 10                 | 0 (pristine)            | 204.17±0.80                    | 3.77±0.14                            | -                             | 9.59±0.11                    |
| 50%              | 10                 | 6                       | 109.18±7.89                    | 1.86±0.28                            | 53.42±3.74                    | 7.27±1.17                    |
| 50%              | 10                 | 8                       | 134.33±2.31                    | 2.01±0.08                            | 65.84±1.31                    | 7.79±0.55                    |
| 50%              | 10                 | 12                      | 177.20±3.40                    | 2.70±0.22                            | 86.85±1.79                    | 9.22±0.85                    |
